# Supplementary material for: Transcriptomics of coping strategies in free-swimming Lepeophtheirus salmonis (Copepoda) larvae responding to abiotic stress
Source: PubMed Central journal article supplement (PMC3557717; doi:10.1111/mec.12072), 2012-10-25

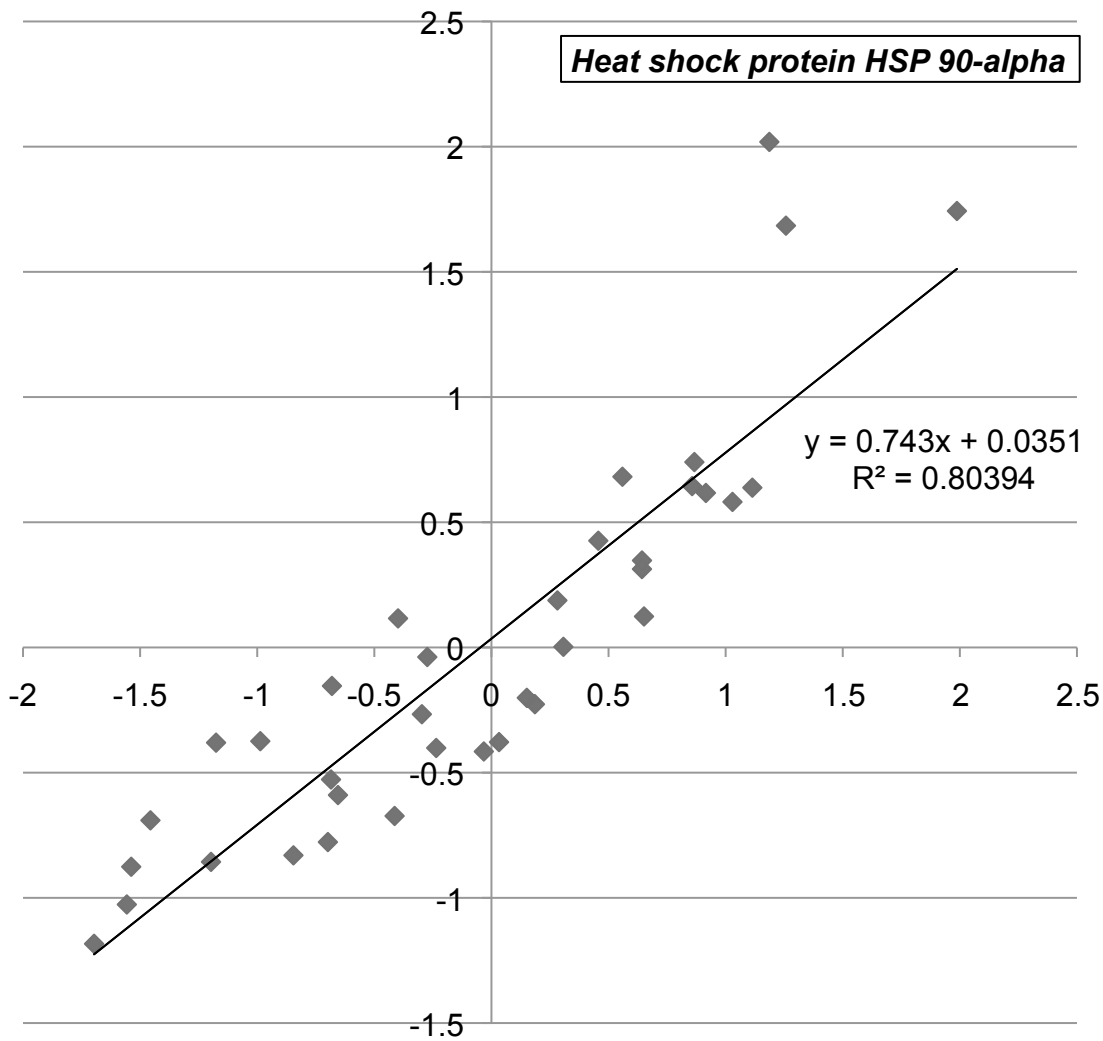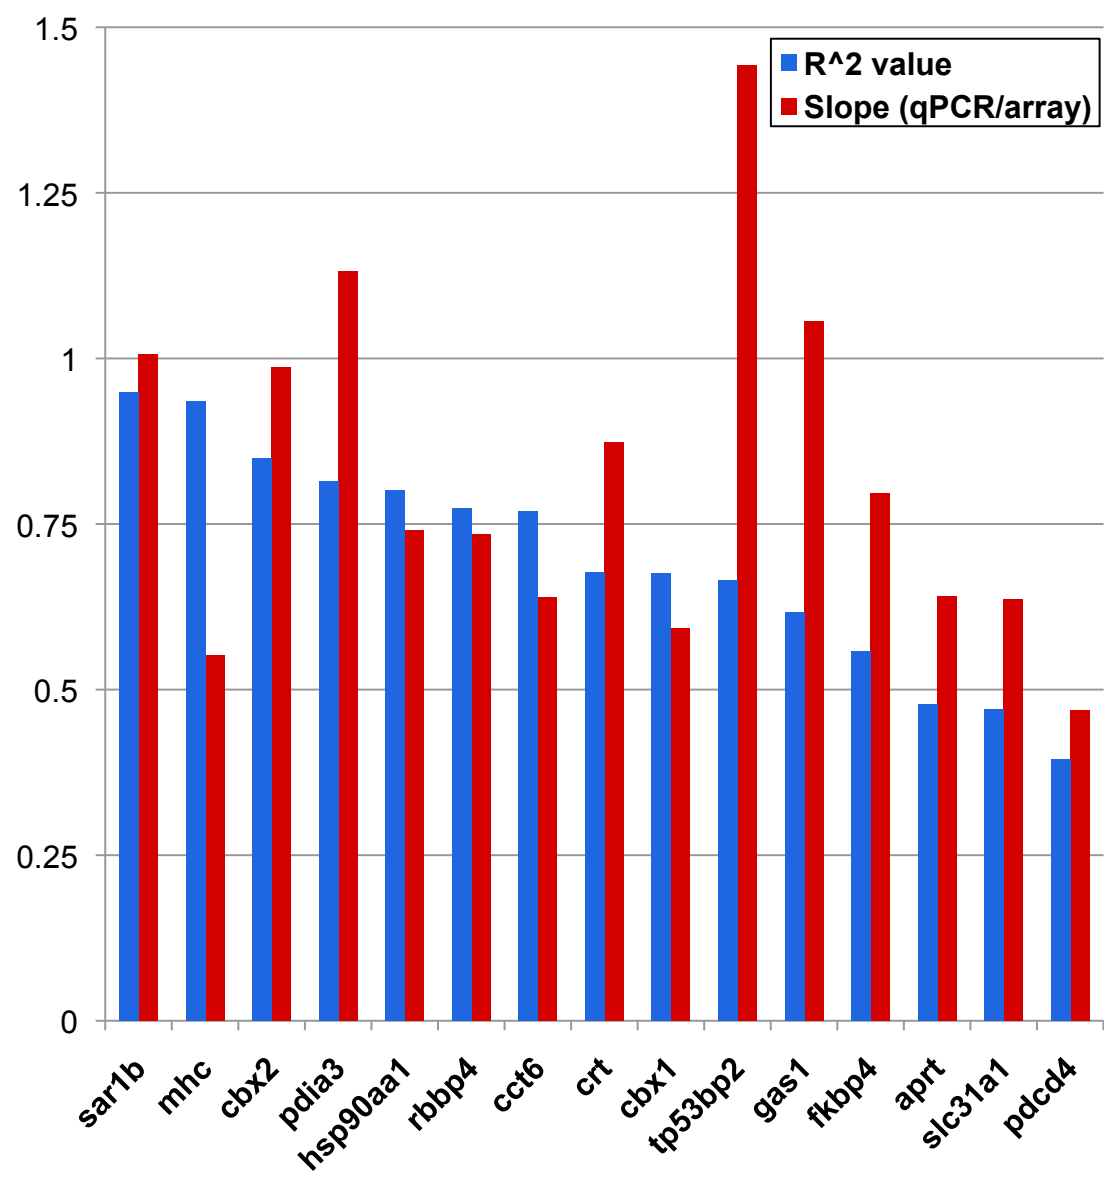

Supplement: mec0021-6000-sd1.pdf [file mec0021-6000-sd1.pdf]
